# Supplementary material for: Adipose Tissue Plasticity During Catch-Up Fat Driven by Thrifty Metabolism
Source: Oxford University Press journal article supplement (doi:10.2337/db08-1793), 2009-07-14
Supplement: db_08_1793_r2_supplementary_file.doc [file db_08_1793_r2_supplementary_file.doc]

**Supplementary Figure 1**

**Relative importance of differential meal pattern in refed and controls**

It could be argued that differential meal pattern in refed and controls (gorging vs nibbling, respectively) may play a role in the high metabolic efficiency underlying catch-up fat. However, the evidence supporting the notion that reduced meal frequency enhances the efficiency at which fat is deposited derives from studies where reduction in meal frequency was achieved by force-feeding using gastric intubation (1, 2). In contrast, altered meal frequency in rats allowed to eat freely does not alter energy expenditure or fat deposition (3). Furthermore, in our study, the quantitative contribution of meal pattern seems small for several reasons: (a) the gorging behaviour is only present during the first few days of refeeding, yet the rate of catch-up fat is almost as high during the 2nd wk as during the 1st (Figure 1, panel B above), (b) most of our measurements during catch-up fat were made after this period of gorging behaviour, namely between day 5 and 10 of refeeding, and (c) furthermore, for studies conducted on day 1 of refeeding, we have minimized the impact of food gorging behaviour by providing the food to refed animals in 3 smaller meals separated by 4h intervals during the semistarvation-refeeding transition period.

References

1. Cohn C, Joseph D. Changes in body composition with force-feeding. *Am J Physiol* **196**: 965-968, 1959.
2. Rothwell NJ, Stock MJ. A paradox in the control of energy intake in the rat. *Nature* **273**: 146-147, 1978.
3. Hill JO, Anderson JC, Lin D, Yakubu F. Effects of meal frequency on energy utilization in rats.  *Am J Physiol***255**: R616-621, 1988.
